# Supplementary material
Source: PubMed Central journal article supplement (PMC5300100)
Supplement: NIHMS71301-supplement-Supplementary_Figures.pdf [file NIHMS71301-supplement-Supplementary_Figures.pdf]

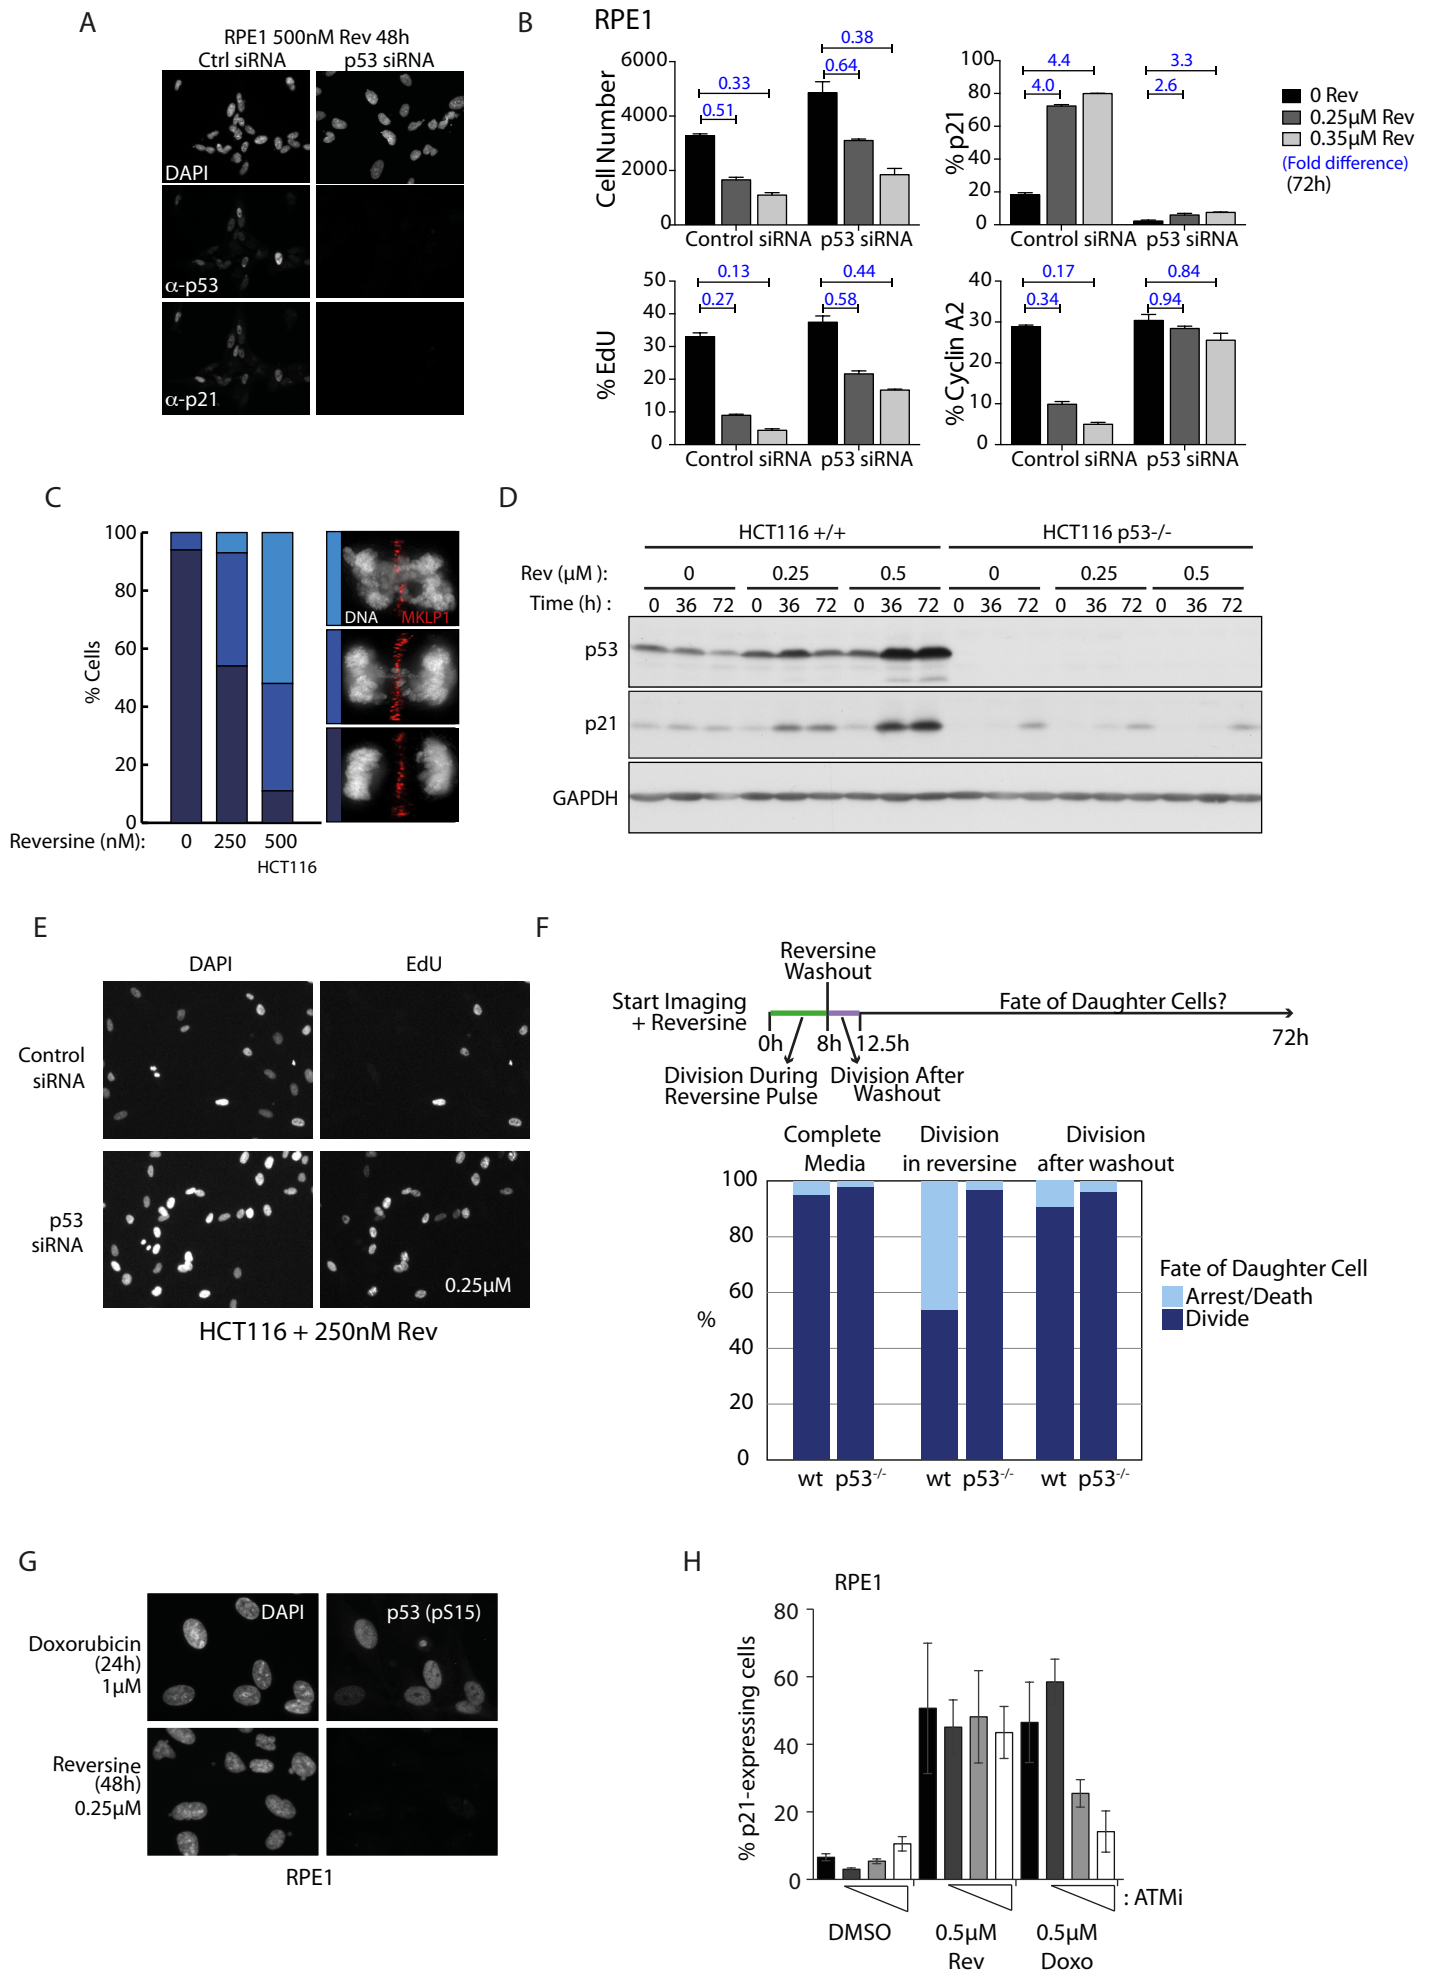

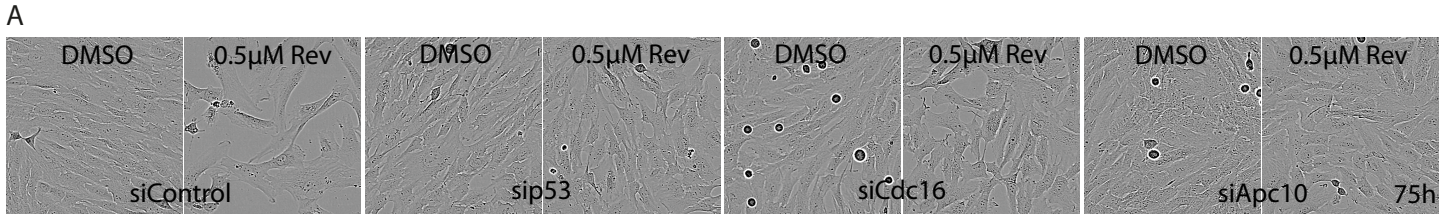

**B**

RPE: siRNA deconvolution

| Gene    | siGen | OTP |
|---------|-------|-----|
| TP53    | 4/4   | 4/4 |
| CDKN1A  | 2/4   | 1/4 |
| ANAPC1  | 1/4   | 3/4 |
| ANAPC5  | nd    | 4/4 |
| ANAPC10 | 4/4   | nd  |
| CDC16   | 4/4   | nd  |
| CDC23   | 4/4   | nd  |
| CDC27   | 3/4   | 3/4 |
| UBE2C   | 3/4   | nd  |
| CDC20*  | 4/4   | nd  |

\*only in 500nM rev  
or transfected 4nM instead of 40nM

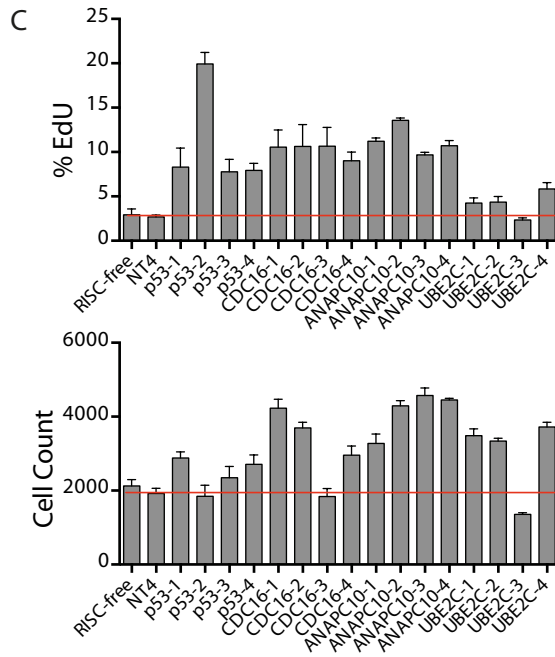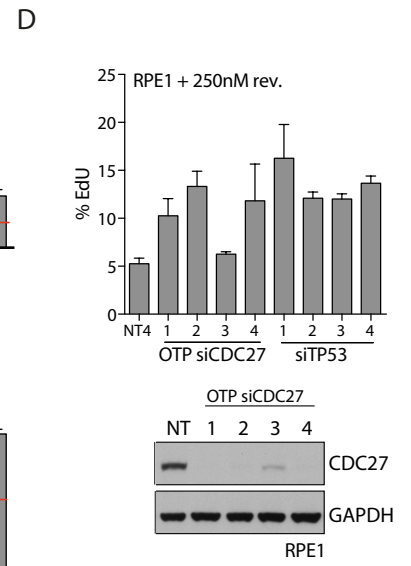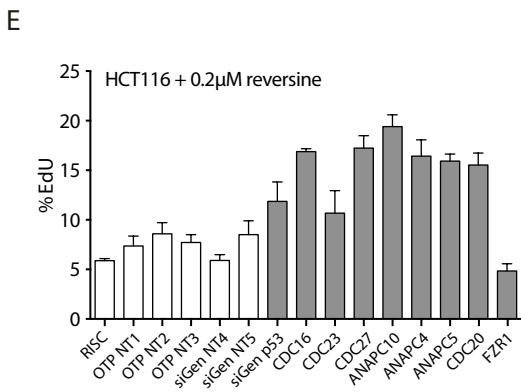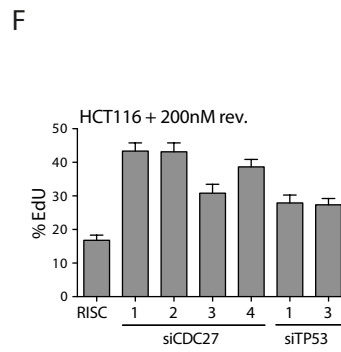

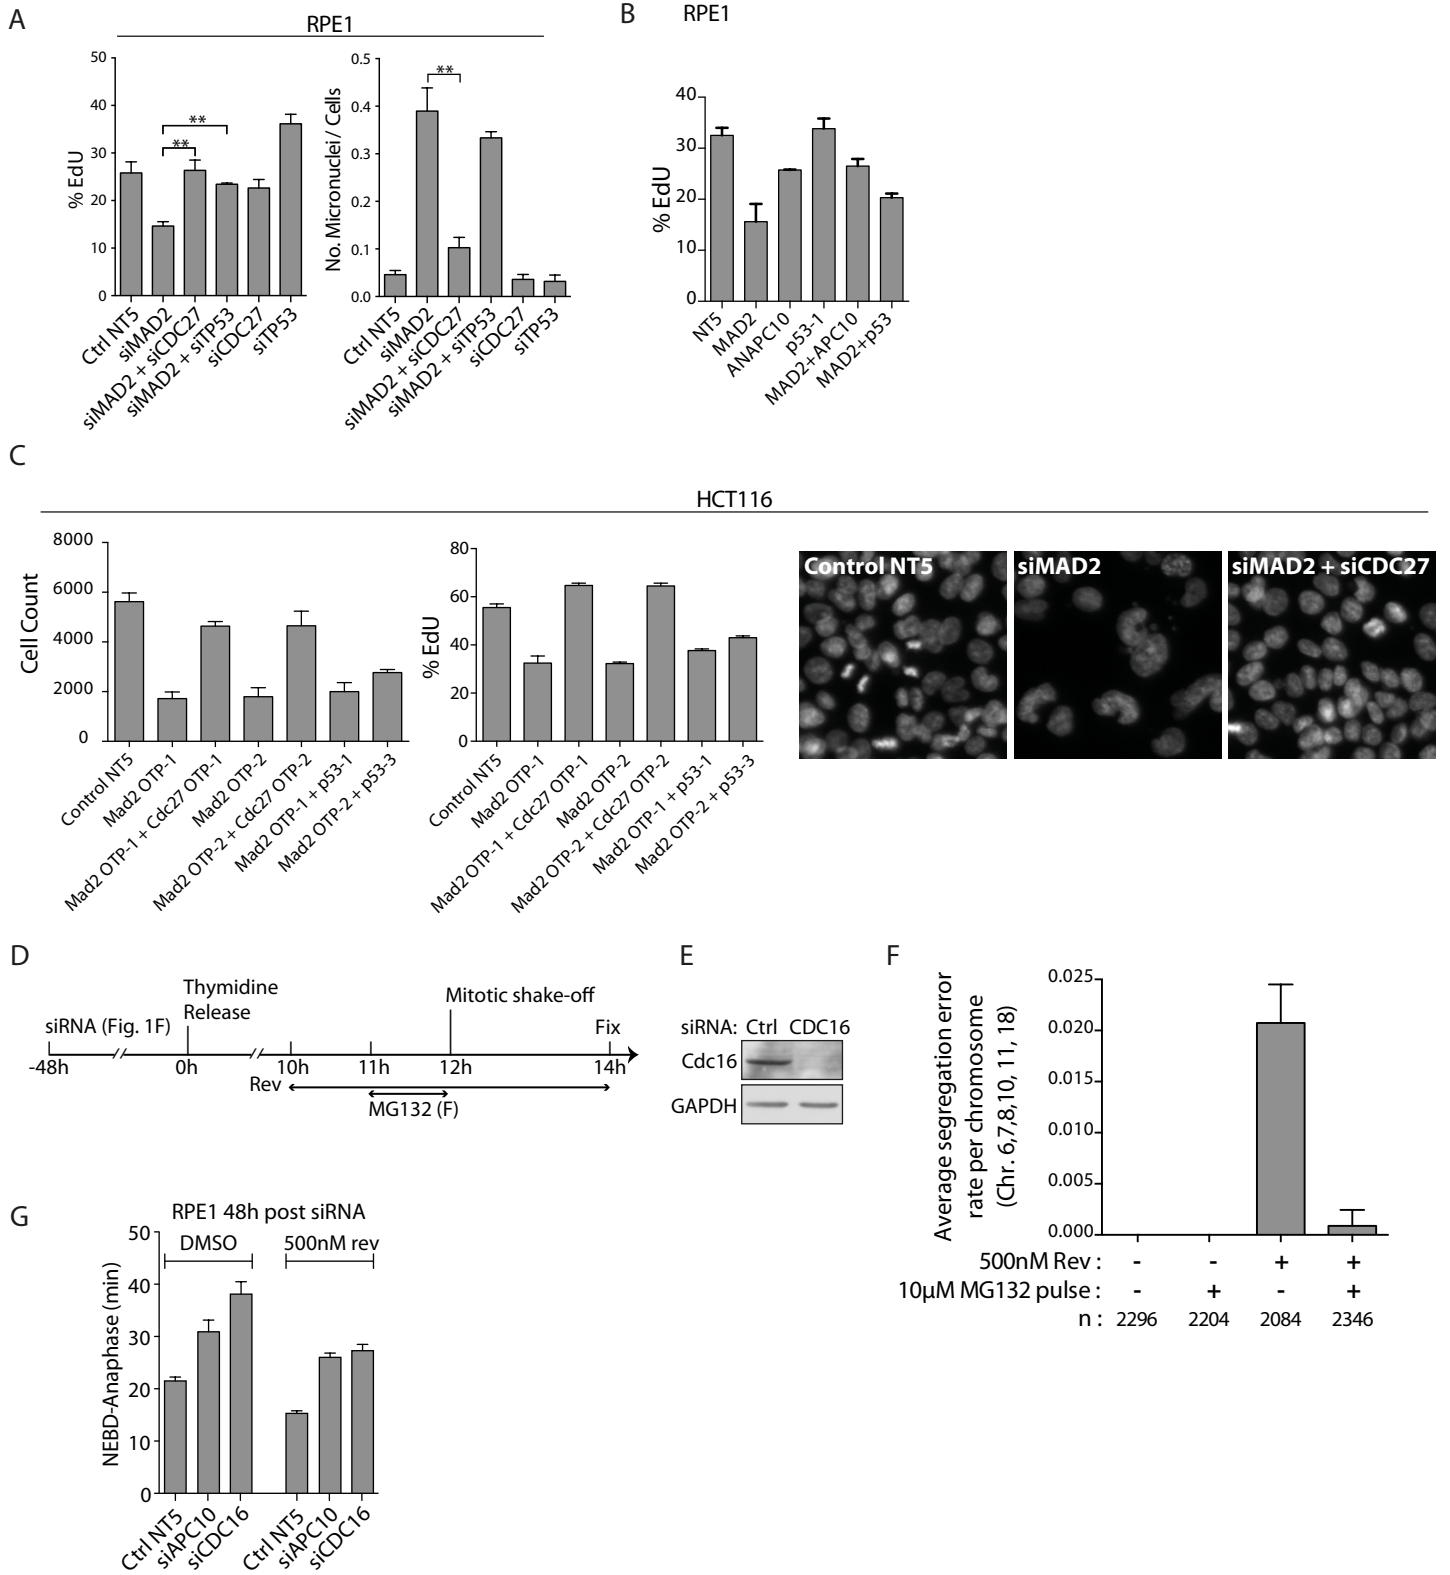

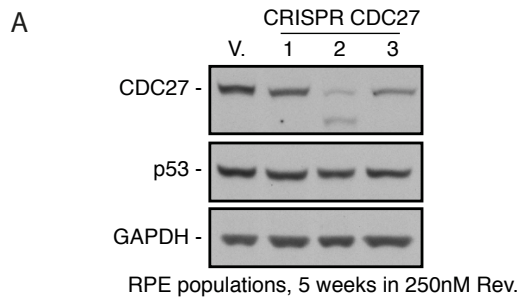

B

|                       | No. clones with CDC27 indel |            |
|-----------------------|-----------------------------|------------|
|                       | 0 Rev.                      | 250nM Rev. |
| <b>Vector</b>         | 0/12                        | 0/12       |
| <b>CRISPR CDC27-1</b> | 5/57                        | 9/9        |
| <b>CRISPR CDC27-2</b> | 11/42                       | 14/14      |
| <b>CRISPR CDC27-3</b> | 1/23                        | 14/15      |

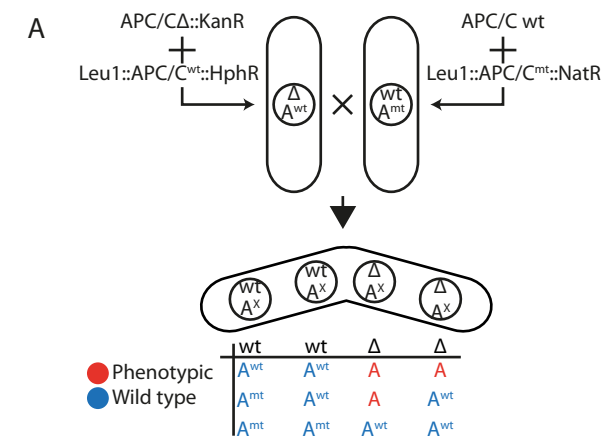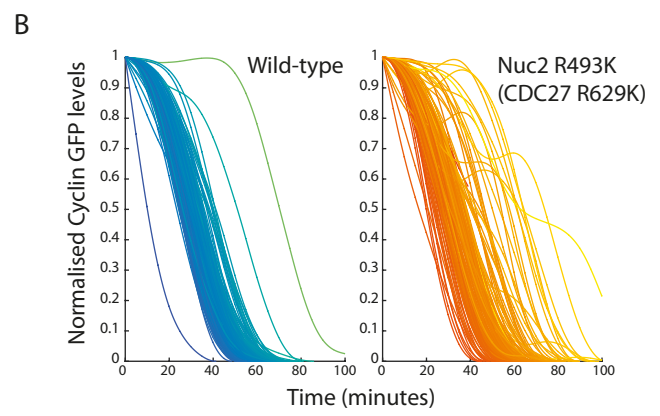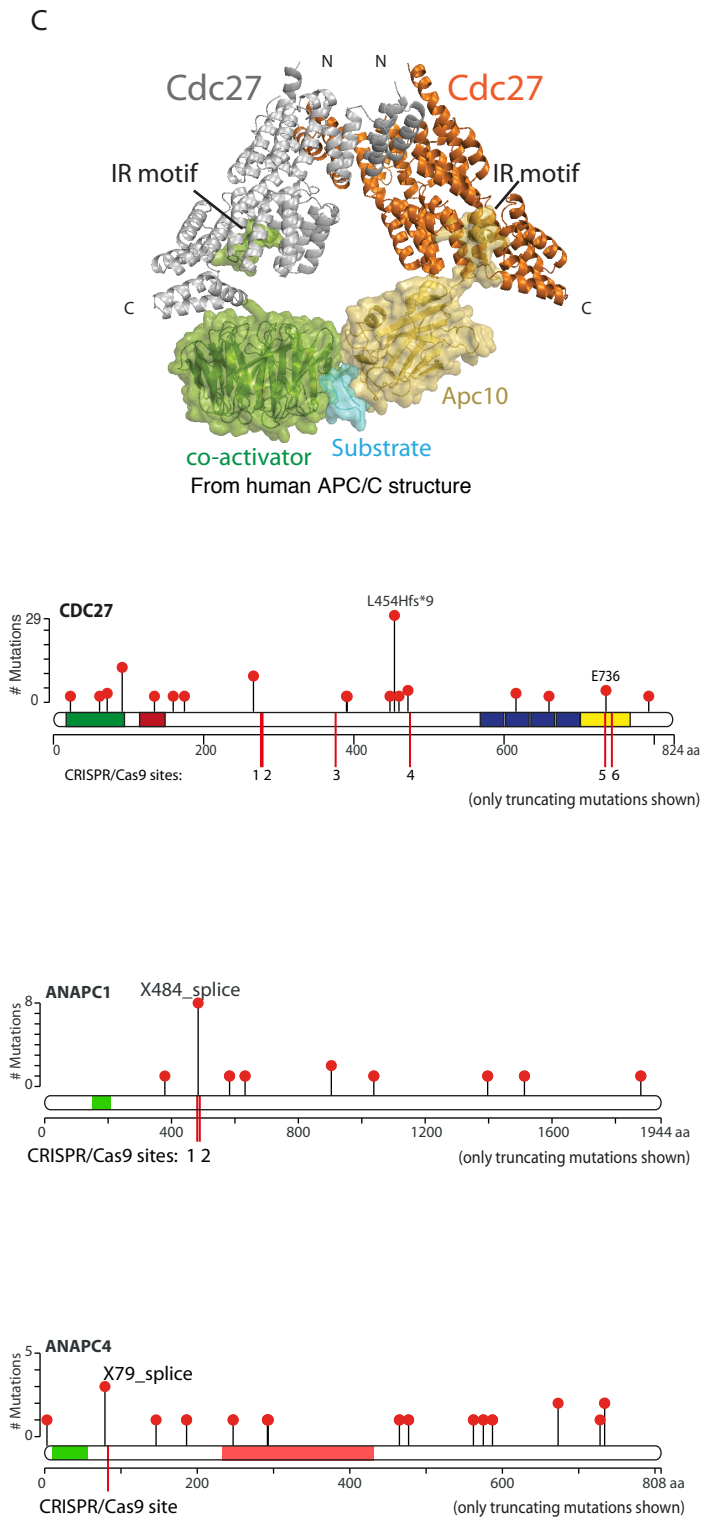

**D** RPE1/lentiCRISPR maintained 30 days in reversine

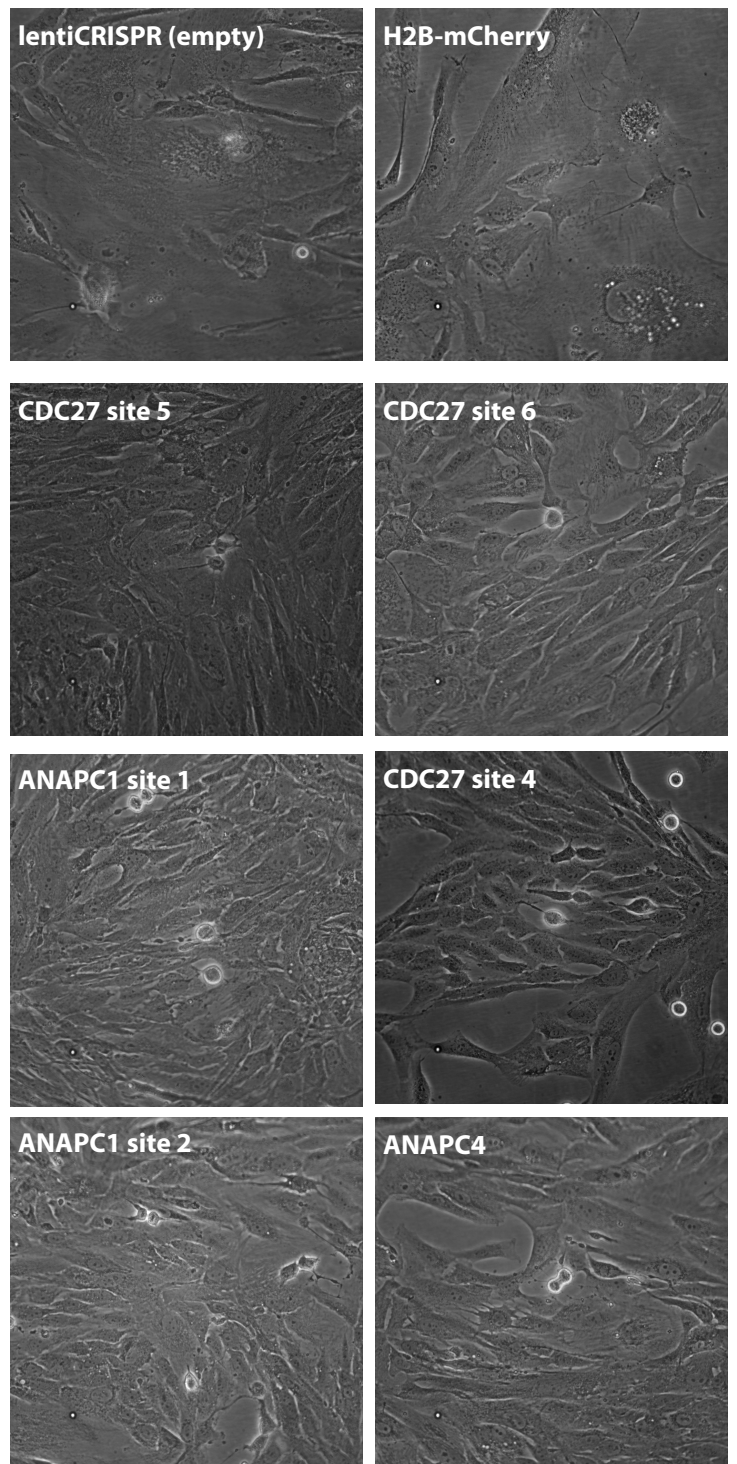

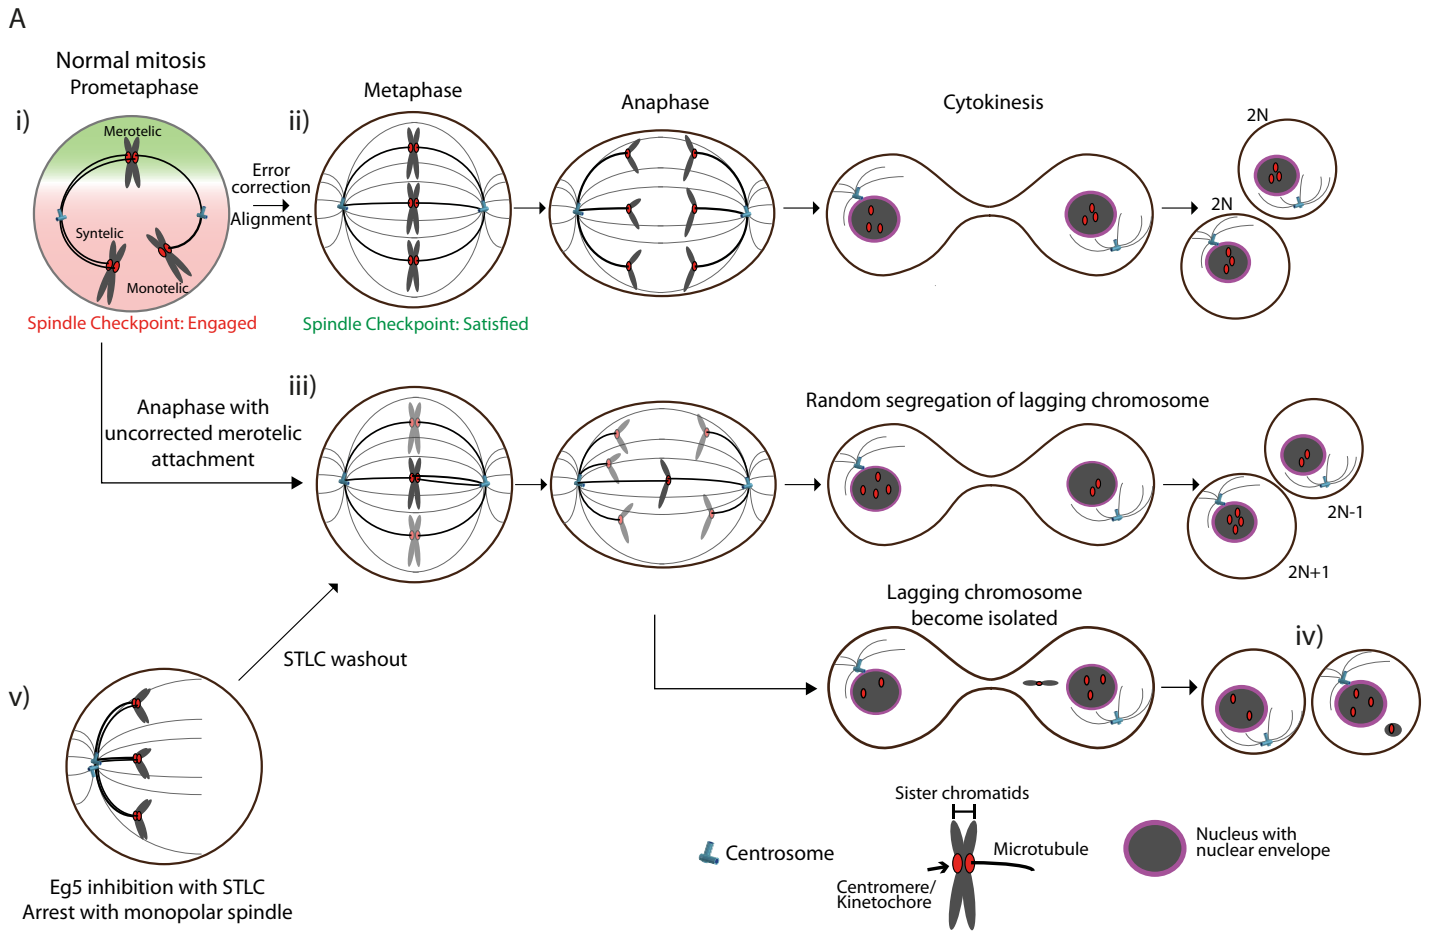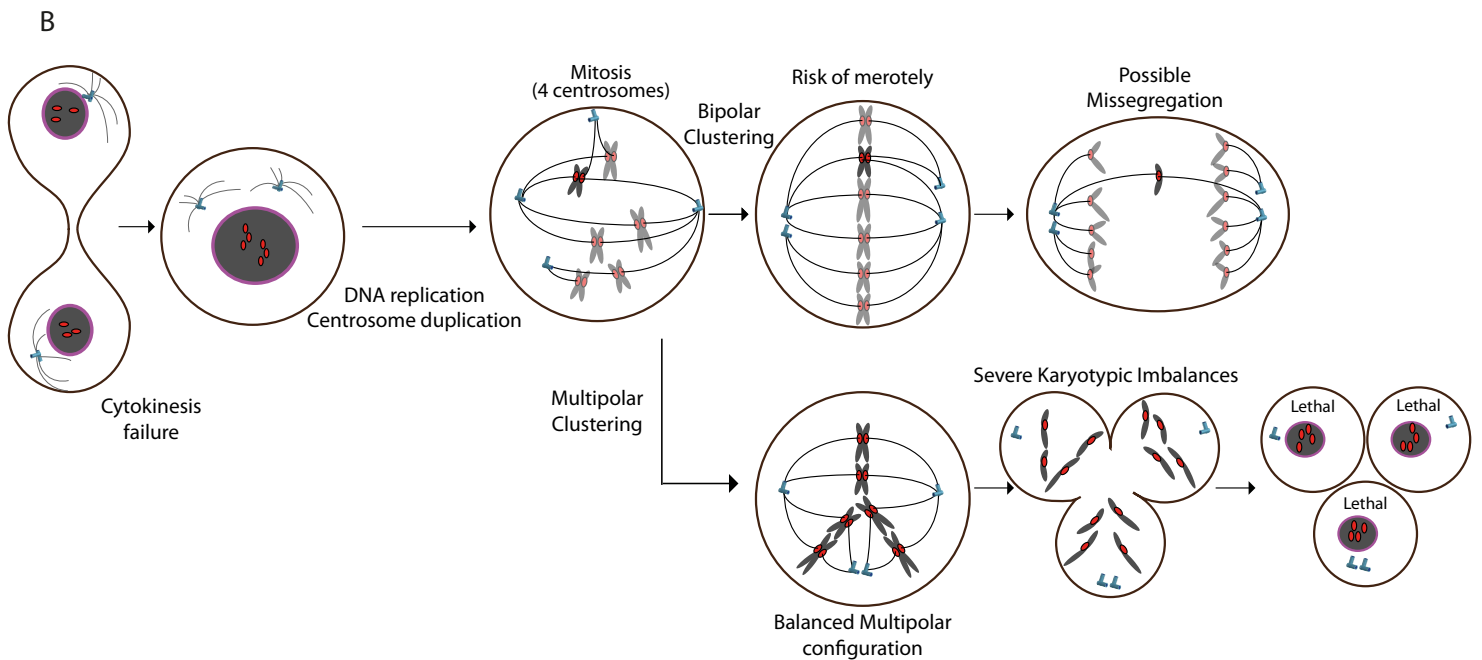

A

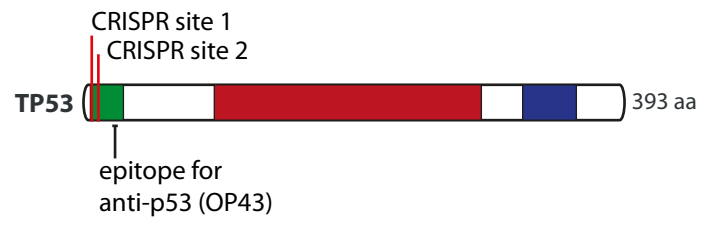

B

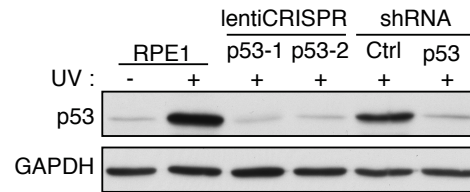

A

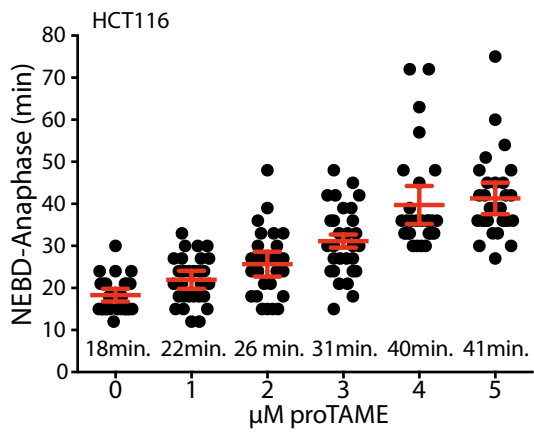

B

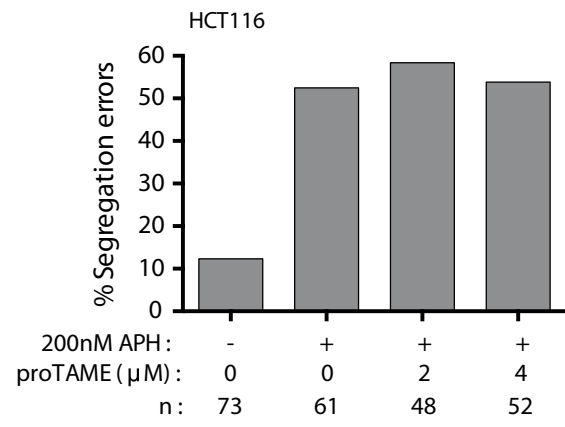



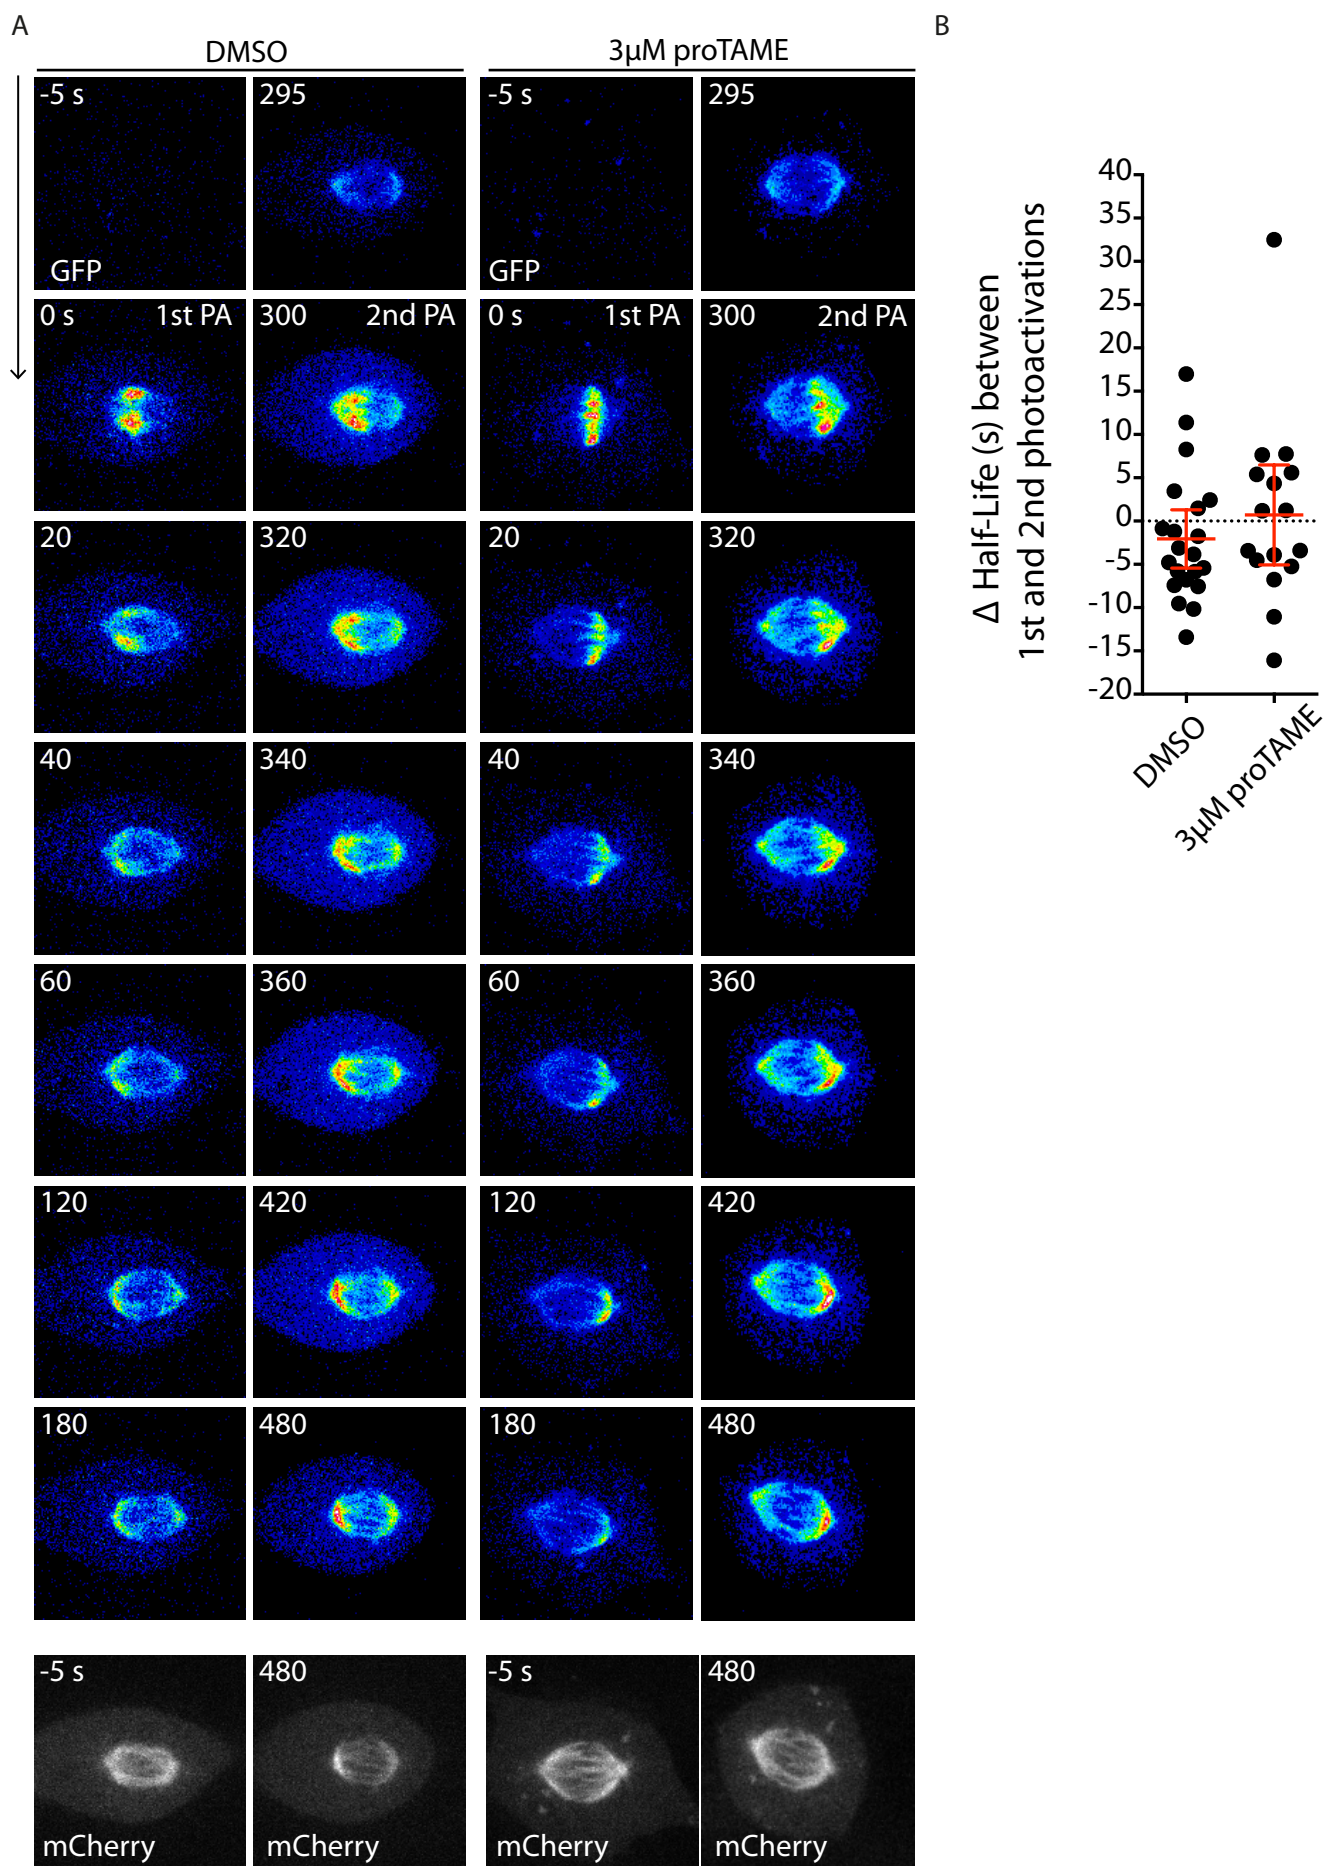

A

| Mixed population<br>Grown in 250nM Rev. | Doubling time<br>after 39 days | Doubling time<br>after 44 days |
|-----------------------------------------|--------------------------------|--------------------------------|
| Vector                                  | crisis                         | few clones<br>picked           |
| p53-1                                   | 55.5h                          | 50.1h                          |
| p53-1<br>4-weeks rev and release        | 46h<br>(8 days since release)  | 32.3h                          |

B

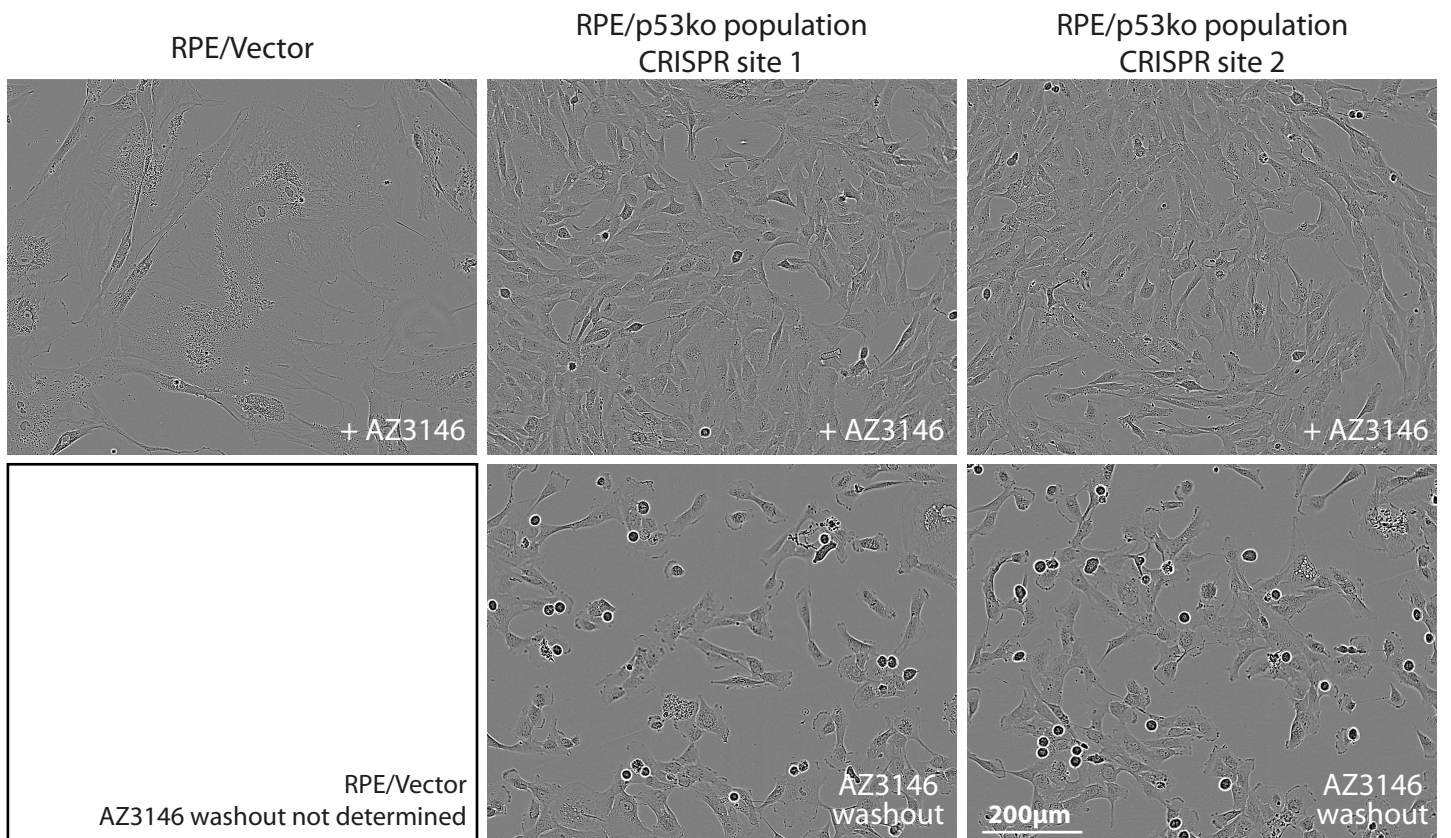

Maintained 51 days in 2µM AZ3146
