# Supplementary material
Source: PubMed Central journal article supplement (PMC5300100)
Supplement: NIHMS71301-supplement-Supplementary_Table_S1.pdf [file NIHMS71301-supplement-Supplementary_Table_S1.pdf]

Supplementary Table S1

|                                    |                                    | Chr 6              | Chr 7              | Chr 8              | Chr 10             | Chr 11            | Chr 18             | Average rate as displayed in corresponding figure |
|------------------------------------|------------------------------------|--------------------|--------------------|--------------------|--------------------|-------------------|--------------------|---------------------------------------------------|
| Related to Fig. 1A                 | <b>0nM Rev</b>                     | <b>0</b>           | <b>0.001071811</b> | <b>0</b>           | <b>0</b>           | nd                | nd                 | <b>0.000267953</b>                                |
|                                    | P versus chr7 (has highest rate)   | 1.00               | -                  | 1.00               | 1.00               | nd                | nd                 |                                                   |
|                                    | <b>250nM Rev</b>                   | <b>0.018644068</b> | <b>0.005067568</b> | <b>0.033898305</b> | <b>0.027027027</b> | nd                | nd                 | <b>0.021159242</b>                                |
|                                    | P versus chr7 (has lowest rate)    | 0.0339             | -                  | 0.0002             | 0.0041             | nd                | nd                 |                                                   |
|                                    | <b>500nM Rev</b>                   | <b>0.0599022</b>   | <b>0.049744898</b> | <b>0.063569682</b> | <b>0.047193878</b> | nd                | nd                 | <b>0.055102665</b>                                |
|                                    | P versus chr7 (has lowest rate)    | 0.3818             | -                  | 0.8373             | 0.2695             | nd                | nd                 |                                                   |
|                                    | <b>750nM Rev</b>                   | <b>0.170781893</b> | <b>0.128358209</b> | <b>0.25308642</b>  | <b>0.179104478</b> | nd                | nd                 | <b>0.18283275</b>                                 |
|                                    | P versus chr7 (has lowest rate)    | 0.1148             | -                  | 0.0001             | 0.0862             | nd                | nd                 |                                                   |
| <b>1000nM Rev</b>                  | <b>0.226</b>                       | <b>0.203562341</b> | <b>0.288</b>       | <b>0.211195929</b> | nd                 | nd                | <b>0.232189567</b> |                                                   |
| P versus chr7                      | 0.4612                             | -                  | 0.0065             | 0.6605             | nd                 | nd                |                    |                                                   |
| Related to Fig. 1F                 | <b>Ctrl</b>                        | <b>0</b>           | <b>0</b>           | nd                 | nd                 | <b>0</b>          | <b>0</b>           | <b>0</b>                                          |
|                                    | <b>CDC16</b>                       | <b>0</b>           | <b>0</b>           | nd                 | nd                 | <b>0</b>          | <b>0</b>           | <b>0</b>                                          |
|                                    | <b>Ctrl</b>                        | <b>0.22</b>        | <b>0.236</b>       | nd                 | nd                 | <b>0.2359551</b>  | <b>0.258427</b>    | <b>0.237595525</b>                                |
|                                    | P value vs Chr6 (has lowest rate)  | -                  | 0.7492             | nd                 | nd                 | 0.7684            | 0.4661             |                                                   |
|                                    | <b>CDC16</b>                       | <b>0.01685393</b>  | <b>0.02247191</b>  | nd                 | nd                 | <b>0.04615385</b> | <b>0.01538462</b>  | <b>0.025216078</b>                                |
|                                    | P value vs Chr18 (has lowest rate) | 1.00               | 1.00               | nd                 | nd                 | 0.6191            | -                  |                                                   |
| Related to Fig. S3F                | <b>0 Rev</b>                       | <b>0</b>           | <b>0</b>           | <b>0</b>           | <b>0</b>           | <b>0</b>          | <b>0</b>           | <b>0</b>                                          |
|                                    | <b>10µM MG132</b>                  | <b>0</b>           | <b>0</b>           | <b>0</b>           | <b>0</b>           | nd                | nd                 | <b>0</b>                                          |
|                                    | <b>500nM Rev</b>                   | <b>0.024208566</b> | <b>0.016018307</b> | <b>0.016759777</b> | <b>0.020594966</b> | <b>0.0234375</b>  | <b>0.0234375</b>   | <b>0.020742769</b>                                |
|                                    | P value vs Chr6 (has lowest rate)  | 0.4968             | -                  | 1.00               | 0.8018             | 0.7019            | 0.7019             |                                                   |
|                                    | <b>500nM Rev + 10µM MG132</b>      | <b>0</b>           | <b>0.001631321</b> | <b>0.001785714</b> | <b>0</b>           | nd                | nd                 | <b>0.000854259</b>                                |
| P value vs Chr18 (has lowest rate) | 1.00                               | 1.00               | 0.4774             | -                  | -                  | -                 |                    |                                                   |
