# Supplementary material
Source: PubMed Central journal article supplement (PMC5300100)
Supplement: NIHMS71301-supplement-Supplementary_Table_S2.pdf [file NIHMS71301-supplement-Supplementary_Table_S2.pdf]

**Supplementary Table S2 (continued)**

|                  |                                                                                            |     |             |             |     |      |       |             |             |
|------------------|--------------------------------------------------------------------------------------------|-----|-------------|-------------|-----|------|-------|-------------|-------------|
| GOTERM_CC_DIRECT | GO:0030496-midbody                                                                         | 7   | 1.58013544  | 0.085127349 | 427 | 130  | 18202 | 2.295334174 | 1           |
| UP_KEYWORDS      | Allosteric enzyme                                                                          | 4   | 0.902934537 | 0.085349517 | 437 | 49   | 20568 | 3.842151964 | 1           |
| GOTERM_CC_DIRECT | GO:0005739-mitochondrion                                                                   | 40  | 9.029345372 | 0.085860351 | 427 | 1331 | 18202 | 1.281070914 | 1           |
| GOTERM_BP_DIRECT | GO:0006024-glycosaminoglycan biosynthetic process                                          | 4   | 0.902934537 | 0.085871287 | 418 | 42   | 16787 | 3.824789246 | 1           |
| GOTERM_BP_DIRECT | GO:0006289-nucleotide-excision repair                                                      | 4   | 0.902934537 | 0.085871287 | 418 | 42   | 16787 | 3.824789246 | 1           |
| GOTERM_BP_DIRECT | GO:0042328-negative regulation of phosphorylation                                          | 3   | 0.677200903 | 0.087189077 | 418 | 20   | 16787 | 6.024043062 | 1           |
| GOTERM_BP_DIRECT | GO:0001892-embryonic placenta development                                                  | 3   | 0.677200903 | 0.087189077 | 418 | 20   | 16787 | 6.024043062 | 1           |
| KEGG_PATHWAY     | hsa00500:Starch and sucrose metabolism                                                     | 4   | 0.902934537 | 0.087306651 | 222 | 33   | 6910  | 3.772863773 | 1           |
| UP_KEYWORDS      | Cell adhesion                                                                              | 16  | 3.611738149 | 0.087465519 | 437 | 479  | 20568 | 1.572154039 | 1           |
| INTERPRO         | IPR000742:Epidermal growth factor-like domain                                              | 10  | 2.257336343 | 0.0879995   | 430 | 231  | 18593 | 1.871841337 | 1           |
| INTERPRO         | IPR004162:Seven-in-absentia protein, sina                                                  | 2   | 0.451467269 | 0.089154357 | 430 | 4    | 18593 | 21.61976744 | 1           |
| INTERPRO         | IPR023213:Chloramphenicol acetyltransferase-like domain                                    | 2   | 0.451467269 | 0.089154357 | 430 | 4    | 18593 | 21.61976744 | 1           |
| INTERPRO         | IPR001646:Peptide repeat                                                                   | 2   | 0.451467269 | 0.089154357 | 430 | 4    | 18593 | 21.61976744 | 1           |
| INTERPRO         | IPR013010:Zinc finger, SIAH-type                                                           | 2   | 0.451467269 | 0.089154357 | 430 | 4    | 18593 | 21.61976744 | 1           |
| INTERPRO         | IPR002355:Multicopper oxidase, copper-binding site                                         | 2   | 0.451467269 | 0.089154357 | 430 | 4    | 18593 | 21.61976744 | 1           |
| INTERPRO         | IPR001078:2-oxoacid dehydrogenase acyltransferase, catalytic domain                        | 2   | 0.451467269 | 0.089154357 | 430 | 4    | 18593 | 21.61976744 | 1           |
| INTERPRO         | IPR018000:Neurotransmitter-gated ion-channel, conserved site                               | 4   | 0.902934537 | 0.089540715 | 430 | 46   | 18593 | 3.759959555 | 1           |
| GOTERM_MF_DIRECT | GO:0005160-transforming growth factor beta receptor binding                                | 4   | 0.902934537 | 0.08969848  | 414 | 42   | 16313 | 3.752703014 | 1           |
| GOTERM_BP_DIRECT | GO:0018108-peptidyl-tyrosine phosphorylation                                               | 8   | 1.805869074 | 0.089735975 | 418 | 154  | 16787 | 2.08624868  | 1           |
| INTERPRO         | IPR002464:DNA/RNA helicase, ATP-dependent, DEAH-box type, conserved site                   | 3   | 0.677200903 | 0.090635704 | 430 | 22   | 18593 | 5.896300211 | 1           |
| GOTERM_BP_DIRECT | GO:0051290-protein heterotrimerization                                                     | 4   | 0.902934537 | 0.090691388 | 418 | 43   | 16787 | 3.735840659 | 1           |
| UP_KEYWORDS      | Transmembrane helix                                                                        | 133 | 30.02257336 | 0.090896043 | 437 | 5621 | 20568 | 1.1136499   | 1           |
| UP_KEYWORDS      | Tricarboxylic acid cycle                                                                   | 3   | 0.677200903 | 0.091138165 | 437 | 24   | 20568 | 5.883295195 | 1           |
| GOTERM_BP_DIRECT | GO:0031954-positive regulation of protein autophosphorylation                              | 3   | 0.677200903 | 0.094838808 | 418 | 21   | 16787 | 5.737183869 | 1           |
| GOTERM_BP_DIRECT | GO:0007067-mitotic nuclear division                                                        | 11  | 2.483069977 | 0.094958425 | 418 | 250  | 16787 | 1.767052632 | 1           |
| GOTERM_BP_DIRECT | GO:0051882-mitochondrial depolarization                                                    | 2   | 0.451467269 | 0.095729421 | 418 | 4    | 16787 | 20.08014354 | 1           |
| GOTERM_BP_DIRECT | GO:0038094-Fc-gamma receptor signaling pathway                                             | 2   | 0.451467269 | 0.095729421 | 418 | 4    | 16787 | 20.08014354 | 1           |
| GOTERM_BP_DIRECT | GO:0006933-negative regulation of cell adhesion involved in substrate-bound cell migration | 2   | 0.451467269 | 0.095729421 | 418 | 4    | 16787 | 20.08014354 | 1           |
| GOTERM_BP_DIRECT | GO:0097118-neurotrophin clustering involved in postsynaptic membrane assembly              | 2   | 0.451467269 | 0.095729421 | 418 | 4    | 16787 | 20.08014354 | 1           |
| GOTERM_BP_DIRECT | GO:0002283-neutrophil activation involved in immune response                               | 2   | 0.451467269 | 0.095729421 | 418 | 4    | 16787 | 20.08014354 | 1           |
| GOTERM_BP_DIRECT | GO:1990182-exosomal secretion                                                              | 2   | 0.451467269 | 0.095729421 | 418 | 4    | 16787 | 20.08014354 | 1           |
| BIOCARTA         | h_g1Pathway:Cell Cycle: G1/S Check Point                                                   | 4   | 0.902934537 | 0.095927216 | 61  | 30   | 1625  | 3.551912568 | 0.999999332 |
| GOTERM_MF_DIRECT | GO:0003712-transcription cofactor activity                                                 | 5   | 1.128668172 | 0.097403141 | 414 | 69   | 16313 | 2.85531751  | 1           |
| GOTERM_MF_DIRECT | GO:0005221-intracellular cyclic nucleotide activated cation channel activity               | 2   | 0.451467269 | 0.097496276 | 414 | 4    | 16313 | 19.70169082 | 1           |
| GOTERM_MF_DIRECT | GO:0019834-phospholipase A2 inhibitor activity                                             | 2   | 0.451467269 | 0.097496276 | 414 | 4    | 16313 | 19.70169082 | 1           |
| INTERPRO         | IPR001111:Transforming growth factor-beta, N-terminal                                      | 3   | 0.677200903 | 0.097807309 | 430 | 23   | 18593 | 5.63893333  | 1           |
| GOTERM_MF_DIRECT | GO:0015297-antipporter activity                                                            | 3   | 0.677200903 | 0.097935121 | 414 | 21   | 16313 | 5.62905452  | 1           |
| UP_KEYWORDS      | Transmembrane                                                                              | 133 | 30.02257336 | 0.097942165 | 437 | 5639 | 20568 | 1.110095088 | 1           |
| UP_SEQ_FEATURE   | topological domain:Mitochondrial intermembrane                                             | 4   | 0.902934537 | 0.097998806 | 435 | 51   | 20063 | 3.617399144 | 1           |
| INTERPRO         | IPR006029:Neurotransmitter-gated ion-channel transmembrane domain                          | 4   | 0.902934537 | 0.098728975 | 430 | 48   | 18593 | 3.603294574 | 1           |
| INTERPRO         | IPR006201:Neurotransmitter-gated ion-channel                                               | 4   | 0.902934537 | 0.098728975 | 430 | 48   | 18593 | 3.603294574 | 1           |
| INTERPRO         | IPR006202:Neurotransmitter-gated ion-channel ligand-binding                                | 4   | 0.902934537 | 0.098728975 | 430 | 48   | 18593 | 3.603294574 | 1           |
| UP_KEYWORDS      | Mitosis                                                                                    | 10  | 2.257336343 | 0.098685582 | 437 | 258  | 20568 | 1.82427758  | 1           |
| UP_KEYWORDS      | Retinitis pigmentosa                                                                       | 5   | 1.128668172 | 0.099791948 | 437 | 83   | 20568 | 2.835322985 | 1           |
