# Supplementary material
Source: PubMed Central journal article supplement (PMC5300100)
Supplement: NIHMS71301-supplement-Supplementary_Table_S3.pdf [file NIHMS71301-supplement-Supplementary_Table_S3.pdf]

**Supplementary Table S3**

| <b>TCGA STUDY NAME</b>                                           | <b>No. of cases altered</b> | <b>Total no. of cases</b> | <b>Percentage altered</b> |
|------------------------------------------------------------------|-----------------------------|---------------------------|---------------------------|
| Adrenocortical Carcinoma                                         | 9                           | 90                        | 10%                       |
| Bladder Urothelial Carcinoma                                     | 17                          | 130                       | 13.10%                    |
| Brain Lower Grade Glioma                                         | 5                           | 286                       | 1.70%                     |
| Breast Invasive Carcinoma                                        | 29                          | 982                       | 3%                        |
| Cervical Squamous Cell Carcinoma and Endocervical Adenocarcinoma | 16                          | 194                       | 8.20%                     |
| Cholangiocarcinoma                                               | 8                           | 35                        | 22.90%                    |
| Colorectal Adenocarcinoma                                        | 27                          | 223                       | 12.10%                    |
| Esophageal Carcinoma                                             | 28                          | 185                       | 15.10%                    |
| Glioblastoma Multiforme                                          | 13                          | 290                       | 4.50%                     |
| Head and Neck Squamous Cell Carcinoma                            | 35                          | 512                       | 6.80%                     |
| Kidney Chromophobe                                               | 12                          | 66                        | 18.20%                    |
| Kidney Renal Clear Cell Carcinoma                                | 26                          | 451                       | 5.80%                     |
| Kidney Renal Papillary Cell Carcinoma                            | 12                          | 282                       | 4.30%                     |
| Liver Hepatocellular Carcinoma                                   | 20                          | 373                       | 5.40%                     |
| Lung Adenocarcinoma                                              | 26                          | 230                       | 11.30%                    |
| Lung Squamous Cell Carcinoma                                     | 18                          | 177                       | 10.20%                    |
| Lymphoid Neoplasm Diffuse Large B-cell Lymphoma                  | 6                           | 48                        | 12.50%                    |
| Ovarian Serous Cystadenocarcinoma                                | 10                          | 316                       | 3.20%                     |
| Pancreatic Adenocarcinoma                                        | 6                           | 150                       | 4%                        |
| Pheochromocytoma and Paraganglioma                               | 6                           | 184                       | 3.30%                     |
| Prostate Adenocarcinoma                                          | 26                          | 499                       | 5.20%                     |
| Sarcoma                                                          | 6                           | 247                       | 2.40%                     |
| Skin Cutaneous Melanoma                                          | 69                          | 368                       | 18.80%                    |
| Stomach Adenocarcinoma                                           | 58                          | 395                       | 14.70%                    |
| Testicular Germ Cell Cancer                                      | 15                          | 155                       | 9.70%                     |
| Thymoma                                                          | 2                           | 123                       | 1.60%                     |
| Thyroid Carcinoma                                                | 3                           | 405                       | 0.70%                     |
| Uterine Carcinosarcoma                                           | 3                           | 57                        | 5.30%                     |
| Uterine Corpus Endometrial Carcinoma                             | 35                          | 248                       | 14.10%                    |
| Uveal Melanoma                                                   | 1                           | 80                        | 1.30%                     |

average 8%

median 6%

range 0.7-22.9%

standard deviation 0.058968568
