# Supplementary material
Source: PubMed Central journal article supplement (PMC5300100)
Supplement: NIHMS71301-supplement-Supplementary_Table_S4.pdf [file NIHMS71301-supplement-Supplementary_Table_S4.pdf]

**Supplementary Table S4**

| GENE    | Size<br>(amino acids) | TCGA (7781 SAMPLES)*                       |                                       |
|---------|-----------------------|--------------------------------------------|---------------------------------------|
|         |                       | # Truncating<br>vs Total # of<br>Mutations | Percentage<br>Truncating<br>Mutations |
| ANAPC1  | 1944                  | 18/127                                     | 14.1                                  |
| ANAPC2  | 822                   | 2/57                                       | 3.5                                   |
| ANAPC4  | 808                   | 18/51                                      | 35.2                                  |
| ANAPC5  | 755                   | 9/55                                       | 16.4                                  |
| ANAPC7  | 599                   | 4/44                                       | 9.1                                   |
| ANAPC10 | 185                   | 1/12                                       | 8.3                                   |
| ANAPC11 | 84                    | 1/4                                        | 25                                    |
| ANAPC13 | 74                    | 2/5                                        | 40                                    |
| ANAPC15 | 121                   | 3/9                                        | 33.3                                  |
| ANAPC16 | 110                   | 3/7                                        | 42.9                                  |
| CDC16   | 620                   | 5/43                                       | 11.6                                  |
| CDC20   | 499                   | 7/33                                       | 21.2                                  |
| CDC23   | 597                   | 5/44                                       | 11.4                                  |
| CDC26   | 85                    | 0/4                                        | 0                                     |
| CDC27   | 824                   | 63/208                                     | 30.3                                  |
| UBE2C   | 179                   | 3/11                                       | 27.3                                  |

\*Data derived from 30 tumor types listed in Supplementary Table S2
