# Supplementary material
Source: PubMed Central journal article supplement (PMC5300100)
Supplement: NIHMS71301-supplement-Supplementary_Table_S5.pdf [file NIHMS71301-supplement-Supplementary_Table_S5.pdf]

Supplementary Table S5

| Gene   | Mutation | In structure? | Surface/buried   | Implication/comment                                                                                                                             | Predicted impact on structural integrity | MutatorAssessor Func. Impact | MutatorAssessor FI score | Polyphen-2 Prediction | Polyphen-2 score |
|--------|----------|---------------|------------------|-------------------------------------------------------------------------------------------------------------------------------------------------|------------------------------------------|------------------------------|--------------------------|-----------------------|------------------|
| ANAPC1 | E139Q    | No            |                  |                                                                                                                                                 |                                          | low                          | 1.5                      | benign                | 0.308            |
| ANAPC1 | F211V    | Yes           | Buried           | Destabilising                                                                                                                                   | Mild/Strong                              | medium                       | 2.83                     | probably damaging     | 0.992            |
| ANAPC1 | G602D    | Yes           | Surface          | Allows bend at loop; G>D destabilising                                                                                                          | Strong                                   | medium                       | 2.02                     | probably damaging     | 0.973            |
| ANAPC1 | H1661Y   | Yes           | Surface          | Destabilising; H situates in hydrophilic environment                                                                                            | Mild/Strong                              | medium                       | 2.155                    | possibly damaging     | 0.826            |
| ANAPC1 | H27R     | Yes           | Buried           | Destabilising                                                                                                                                   | Strong                                   | low                          | 0.895                    | probably damaging     | 0.981            |
| ANAPC1 | M525V    | No            |                  |                                                                                                                                                 |                                          | low                          | 1.32                     | benign                | 0.001            |
| ANAPC1 | N280K    | Yes           | Buried           | Destabilising                                                                                                                                   | Strong                                   | medium                       | 2.015                    | benign                | 0.18             |
| ANAPC1 | P314S    | No            |                  |                                                                                                                                                 |                                          | medium                       | 2.32                     | probably damaging     | 0.993            |
| ANAPC1 | P558L    | No            |                  |                                                                                                                                                 |                                          | low                          | 1.575                    | benign                | 0.001            |
| ANAPC1 | Q846P    | Yes           | Buried           | Destabilising                                                                                                                                   | Strong                                   | medium                       | 1.95                     | benign                | 0.261            |
| ANAPC1 | R1726T   | No            |                  |                                                                                                                                                 |                                          | low                          | 1.69                     | benign                | 0.442            |
| ANAPC1 | R453L    | Yes           | Partially buried | Destabilising                                                                                                                                   | Strong                                   | medium                       | 2.36                     | probably damaging     | 0.993            |
| ANAPC1 | R871K    | Yes           | Surface          | Solvent exposed                                                                                                                                 | None                                     | neutral                      | -0.88                    | benign                | 0                |
| ANAPC1 | Y1552C   | Yes           | Buried           | Destabilising                                                                                                                                   | Strong                                   | medium                       | 3.41                     | probably damaging     | 0.999            |
| ANAPC1 | L1770F   | Yes           | Buried           | Part of interface with Apc5; end of helical repeat                                                                                              | Mild. Similar side chain property.       | neutral                      | -0.08                    | benign                | 0.003            |
| ANAPC1 | L230I    | No            | Surface          | On a loop of Apc1 WD40 domain                                                                                                                   | N/A                                      | neutral                      | 0.69                     | benign                | 0                |
| ANAPC1 | D568N    | No            | Surface          | Surface extended loop; not in structure                                                                                                         | N/A                                      | neutral                      | 0.585                    | possibly damaging     | 0.455            |
| ANAPC1 | P1658S   | Yes           | Buried           | Surface on beta jelly roll domain. Interface between PC repeat and beta jelly roll domain.                                                      | Mild                                     | medium                       | 2.645                    | benign                | 0.295            |
| ANAPC1 | P517T    | No            | Surface          | On a loop of Apc1 WD40 domain.                                                                                                                  | None                                     | low                          | 1.2                      | benign                | 0.001            |
| ANAPC1 | D52N     | Yes           | Buried           | On a loop between domains of Cdc23                                                                                                              | Mild                                     | low                          | 1.15                     | probably damaging     | 0.997            |
| ANAPC1 | F1592L   | Yes           | Buried           | At the central helices of PC repeat                                                                                                             | Mild. Similar side chain property.       | low                          | 1.24                     | probably damaging     | 0.99             |
| ANAPC1 | E219K    | Yes           | Buried           | Interacts with R458 of Cdc23                                                                                                                    | Mild                                     | medium                       | 2.64                     | probably damaging     | 0.995            |
| ANAPC1 | R1600W   | Yes           | Surface          | On a surface loop forming interface with Apc10; may disrupt Apc10 binding                                                                       | Strong                                   | medium                       | 2.525                    | probably damaging     | 0.995            |
| ANAPC1 | T416M    | No            | Surface          | On a loop of Apc1 WD40 domain.                                                                                                                  | None                                     | low                          | 1.59                     | benign                | 0.431            |
| ANAPC1 | E772K    | Yes           | Buried           | At the end of a helix; interacts with main chain to stabilise turn; destabilising                                                               | Strong                                   | medium                       | 2.36                     | benign                | 0.083            |
| ANAPC1 | S615C    | Yes           | Buried           | On a surface loop forming interface with Apc5                                                                                                   | Mild                                     | medium                       | 2.445                    | probably damaging     | 0.999            |
| ANAPC1 | S341L    | No            | N/A              | Sites of CDK-dependent phosphorylation of Apc1, likely to contribute to APC/C activation in mitosis (Zhang et al., 2016)                        | N/A                                      | low                          | 1.7                      | probably damaging     | 0.981            |
| ANAPC1 | S736L    | No            | N/A              | N/A                                                                                                                                             | N/A                                      | neutral                      | 0.55                     | benign                | 0                |
| ANAPC1 | L1651F   | Yes           | Buried           | May disrupt the structure of the jelly roll domain                                                                                              | Mild. Similar side chain property.       | medium                       | 2.015                    | benign                | 0.435            |
| ANAPC1 | S355F    | No            | N/A              | Sites of CDK-dependent phosphorylation of Apc1, likely to contribute to APC/C activation in mitosis (Zhang et al., 2016; Kraft et al EMBO 2003) | N/A                                      | low                          | 1.935                    | probably damaging     | 0.99             |
| ANAPC1 | V471A    | Yes           | Surface          | On the surface of of Apc1 WD40 beta propeller blade                                                                                             | None                                     | low                          | 1.18                     | possibly damaging     | 0.765            |
| ANAPC1 | Q1665L   | Yes           | Buried           | Outside surface of central beta sheet.                                                                                                          | None                                     | low                          | 1.5                      | benign                | 0.039            |
| ANAPC1 | L1928V   | Yes           | Surface          | Side chain chemistry preserved                                                                                                                  | Mild                                     | low                          | 1.04                     | possibly damaging     | 0.956            |
| ANAPC1 | S1530L   | Yes           | Buried           | Surface on PC repeat. Interface between PC repeat and beta jelly roll domain.                                                                   | Mild                                     | medium                       | 2.575                    | possibly damaging     | 0.816            |
| ANAPC1 | L1662I   | Yes           | Buried           | Surface on beta jelly roll domain. Interface between PC repeat and beta jelly roll domain.                                                      | Mild                                     | low                          | 1.405                    | possibly damaging     | 0.455            |
| ANAPC2 | D395H    | Yes           | Buried           | Destabilising                                                                                                                                   | Strong                                   | medium                       | 3.305                    | probably damaging     | 1                |
| ANAPC2 | E610D    | Yes           | Partially buried | Salt bridged preserved                                                                                                                          | Mild                                     | low                          | 1.55                     | benign                | 0.008            |
| ANAPC2 | F515I    | Yes           | Buried           | Mildly destabilising; Hydrophobicity and size preserved                                                                                         | Mild/Strong                              | medium                       | 2.65                     | probably damaging     | 1                |
| ANAPC2 | G193E    | No            |                  |                                                                                                                                                 |                                          | low                          | 0.895                    | benign                | 0.001            |
| ANAPC2 | K495N    | Yes           | Partially buried | Salt bridge disrupted                                                                                                                           | Mild/Strong                              | low                          | 1.525                    | probably damaging     | 0.601            |
| ANAPC2 | L514F    | Yes           | Buried           | Mildly destabilising; Hydrophobicity and size preserved                                                                                         | Mild                                     | medium                       | 2.415                    | probably damaging     | 0.999            |
| ANAPC2 | R408S    | Yes           | Partially buried | Salt bridge disrupted                                                                                                                           | Mild/Strong                              | medium                       | 2.43                     | probably damaging     | 0.992            |
| ANAPC2 | P482L    | Yes           | Surface          | Loop forms interface with Apc1.                                                                                                                 | Mild                                     | medium                       | 3.3                      | probably damaging     | 1                |

Supplementary Table S5 (continued)

| Gene         | Mutation | In structure? | Surface/buried   | Implication/comment                                                                                               | Predicted impact on structural integrity | MutatorAssessor Func. Impact | MutatorAssessor FI score | Polyphen-2 Prediction | Polyphen-2 score |
|--------------|----------|---------------|------------------|-------------------------------------------------------------------------------------------------------------------|------------------------------------------|------------------------------|--------------------------|-----------------------|------------------|
| ANAPC2       | Y622H    | Yes           | Buried           | Destabilises sheet-helix interaction between Apc2 and Apc11; may compromise ubiquitination efficiency             | Strong                                   | medium                       | 3.15                     | probably damaging     | 1                |
| ANAPC2       | R340H    | Yes           | Buried           | Destabilises hairpin between helical pair on Apc2; may compromise substrate ubiquitination efficiency             | Strong                                   | medium                       | 2.005                    | probably damaging     | 0.982            |
| CDC27 (APC3) | E511K    | Yes           | Buried           | Salt bridge disrupted. Predicted to disrupt the IR-tail binding site of co-activators and APC10                   | Strong                                   | medium                       | 2.585                    | probably damaging     | 1                |
| CDC27 (APC3) | L474V    | Yes           | Partially buried | Hydrophobicity preserved                                                                                          | Mild                                     | low                          | 1.2                      | benign                | 0.002            |
| CDC27 (APC3) | R130W    | Yes           | Buried           | Salt bridge disrupted                                                                                             | Strong                                   | medium                       | 2.14                     | probably damaging     | 1                |
| CDC27 (APC3) | S379L    | No            |                  |                                                                                                                   |                                          | medium                       | 1.995                    | probably damaging     | 0.996            |
| CDC27 (APC3) | S553L    | Yes           | Buried           | Bulky mutation                                                                                                    | Strong                                   | medium                       | 3.265                    | probably damaging     | 1                |
| CDC27 (APC3) | S566L    | Yes           | Partially buried | On loop; mild                                                                                                     | Mild                                     | medium                       | 3.04                     | probably damaging     | 0.996            |
| CDC27 (APC3) | S761F    | Yes           | Buried           | Destabilising                                                                                                     | Strong                                   | medium                       | 3.02                     | probably damaging     | 1                |
| CDC27 (APC3) | Y496C    | Yes           | Buried           | Hydrophobicity and size preserved                                                                                 | Mild                                     | medium                       | 2.085                    | probably damaging     | 1                |
| CDC27 (APC3) | R266Q    | No            | N/A              | N/A                                                                                                               | N/A                                      | low                          | 1.04                     | possibly damaging     | 0.921            |
| CDC27 (APC3) | G248E    | No            | N/A              | N/A                                                                                                               | N/A                                      | neutral                      | 0                        | benign                | 0.097            |
| CDC27 (APC3) | P246S    | No            | N/A              | N/A                                                                                                               | N/A                                      | neutral                      | 0.345                    | benign                | 0                |
| CDC27 (APC3) | R629K    | Yes           | Surface          | At an interface with Apc7 / Cdc16                                                                                 | Mild                                     | low                          | 1.84                     | possibly damaging     | 0.851            |
| CDC27 (APC3) | D597H    | Yes           | Surface          | Solvent exposed                                                                                                   | Mild                                     | medium                       | 3.41                     | probably damaging     | 0.995            |
| CDC27 (APC3) | G506E    | Yes           | Buried           | Mutation could disrupt hydrophobic core. Predicted to disrupt the IR-tail binding site of co-activators and APC10 | Strong                                   | medium                       | 2.765                    | probably damaging     | 1                |
| CDC27 (APC3) | L144V    | Yes           | Surface          | On a loop between two helices                                                                                     | Mild. Similar side chain property.       | low                          | 1.905                    | possibly damaging     | 0.747            |
| CDC27 (APC3) | A273T    | No            | N/A              | N/A                                                                                                               | N/A                                      | low                          | 0.895                    | benign                | 0.014            |
| CDC27 (APC3) | V25F     | Yes           | Buried           | On a loop between two helices                                                                                     | Mild. Similar side chain property.       | low                          | 1.83                     | probably damaging     | 0.996            |
| CDC27 (APC3) | A274D    | No            | N/A              | N/A                                                                                                               | N/A                                      | neutral                      | 0.695                    | benign                | 0.363            |
| CDC27 (APC3) | S252T    | No            | N/A              | N/A                                                                                                               | N/A                                      | neutral                      | 0.695                    | benign                | 0                |
| CDC27 (APC3) | S177I    | No            | N/A              | N/A                                                                                                               | N/A                                      | neutral                      | 0.695                    | benign                | 0.177            |
| CDC27 (APC3) | S252F    | No            | N/A              | N/A                                                                                                               | N/A                                      | neutral                      | 0.695                    | benign                | 0.162            |
| CDC27 (APC3) | N213D    | No            | N/A              | N/A                                                                                                               | N/A                                      | neutral                      | 0.695                    | benign                | 0.167            |
| CDC27 (APC3) | H490Q    | Yes           | Surface          | Outside of TPR/HEAT repeat; solvent exposed                                                                       | None                                     | neutral                      | -1.65                    | benign                | 0                |
| CDC27 (APC3) | I487V    | Yes           | Surface          | Mildly destabilising; hydrophobicity preserved                                                                    | Mild                                     | low                          | 0.935                    | benign                | 0.024            |
| ANAPC4       | D694G    | Yes           | Buried           | Salt bridge disrupted                                                                                             | Mild/Strong                              | low                          | 1.32                     | benign                | 0.024            |
| ANAPC4       | P378L    | Yes           | Buried           | P allows loop bending; P>L disrupts loop                                                                          | Strong                                   | low                          | 1.59                     | possibly damaging     | 0.811            |
| ANAPC4       | Q335H    | Yes           | Surface          | Solvent exposed                                                                                                   | None                                     | low                          | 1.15                     | probably damaging     | 0.999            |
| ANAPC4       | R739C    | Yes           | Surface          | Charged to hydrophobic                                                                                            | Mild                                     | low                          | 1.495                    | probably damaging     | 1                |
| ANAPC4       | R250Q    | Yes           | Buried           | At interface with Apc5                                                                                            | Mild                                     | low                          | 1.04                     | probably damaging     | 0.996            |
| ANAPC4       | H114R    | Yes           | Buried           | In centre of WD40 barrel; a relatively small change                                                               | Mild                                     | low                          | 0.84                     | benign                | 0.146            |
| ANAPC4       | L167P    | Yes           | Buried           | Intra-domain stabilisation                                                                                        | Mild                                     | medium                       | 2.175                    | probably damaging     | 1                |
| ANAPC4       | R739C    | Yes           | Surface          | Solvent exposed                                                                                                   | None                                     | low                          | 1.1                      | probably damaging     | 1                |
| ANAPC4       | R12W     | Yes           | Surface          | Solvent exposed                                                                                                   | None                                     | low                          | 1.355                    | probably damaging     | 0.974            |
| ANAPC5       | A734V    | Yes           | Buried           | A and V are similar                                                                                               | Mild                                     | medium                       | 1.975                    | probably damaging     | 0.995            |
| ANAPC5       | D517G    | Yes           | Partially buried | Salt bridge disrupted                                                                                             | Mild/Strong                              | low                          | 0.805                    | possibly damaging     | 0.89             |
| ANAPC5       | R434C    | Yes           | Partially buried | Salt bridge disrupted - Destabilizing                                                                             | Strong                                   | neutral                      | 0.69                     | probably damaging     | 0.998            |
| ANAPC5       | S118F    | Yes           | Buried           | Bulky mutation                                                                                                    | Strong                                   | medium                       | 2.015                    | possibly damaging     | 0.855            |
| ANAPC5       | S208F    | Yes           | Buried           | Bulky mutation                                                                                                    | Strong                                   | medium                       | 2.255                    | possibly damaging     | 0.938            |
| ANAPC5       | S611F    | Yes           | Buried           | Bulky mutation                                                                                                    | Strong                                   | low                          | 1.5                      | possibly damaging     | 0.612            |
| ANAPC5       | E542Q    | Yes           | Surface          | In the centre of TPR barrel; may disrupt interaction with Apc15.                                                  | Mild                                     | low                          | 1.5                      | probably damaging     | 1                |
| ANAPC5       | A734V    | Yes           | Buried           | May interfere with Emi1 binding                                                                                   | Strong                                   | low                          | 1.795                    | probably damaging     | 0.995            |
| ANAPC5       | P498S    | Yes           | Buried           | Forms loop between two helices of TPR repeats                                                                     | Mild                                     | low                          | 1.795                    | probably damaging     | 1                |
| ANAPC5       | N91D     | Yes           | Surface          | Solvent exposed                                                                                                   | None                                     | low                          | 0.895                    | benign                | 0.094            |
| ANAPC5       | D226V    | Yes           | Buried           | Interface between TPR stacks.                                                                                     | Mild                                     | low                          | 1.795                    | probably damaging     | 1                |
| ANAPC5       | A600T    | Yes           | Buried           | Between helices.                                                                                                  | Strong                                   | low                          | 1.895                    | probably damaging     | 0.999            |

Supplementary Table S5 (continued)

| Gene    | Mutation | In structure?       | Surface/buried   | Implication/comment                                                                                                      | Predicted impact on structural integrity | MutatorAssessor Func. Impact | MutatorAssessor FI score | Polyphen-2 Prediction | Polyphen-2 score |
|---------|----------|---------------------|------------------|--------------------------------------------------------------------------------------------------------------------------|------------------------------------------|------------------------------|--------------------------|-----------------------|------------------|
| ANAPC5  | P233T    | Yes                 | Surface          | Forms loop between two helices.                                                                                          | Mild                                     | medium                       | 2.215                    | probably damaging     | 1                |
| ANAPC7  | A242V    | Yes                 | Buried           | A similar to V                                                                                                           | Mild                                     | low                          | 1.665                    | probably damaging     | 0.998            |
| ANAPC7  | P302S    | Yes                 | Buried           | P on loop; P>S disrupts loop bending                                                                                     | Strong                                   | low                          | 1.04                     | probably damaging     | 1                |
| ANAPC7  | V450I    | Yes                 | Partially buried | Hydrophobicity preserved                                                                                                 | Mild                                     | low                          | 1.095                    | possibly damaging     | 0.547            |
| ANAPC7  | Y93C     | Yes                 | Buried           | Hydrophobicity and size preserved                                                                                        | Mild                                     | low                          | 0.975                    | probably damaging     | 0.996            |
| ANAPC7  | S86F     | Yes                 | Buried           | Packs between 2 helices>F would probably destabilise dimer interface.                                                    | Strong                                   | low                          | 1.2                      | probably damaging     | 0.996            |
| ANAPC7  | L207V    | Yes                 | Surface          | Inside of TPR/HEAT crescent.                                                                                             | Mild                                     | low                          | 0.895                    | benign                | 0.047            |
| ANAPC7  | E144K    | Yes                 | Surface          | Inside of solvent accessible channel between dimer.                                                                      | None                                     | neutral                      | 0.345                    | benign                | 0.002            |
| ANAPC7  | E415K    | Yes                 | Surface          | Inside of TPR/HEAT crescent.                                                                                             | None                                     | low                          | 1.245                    | possibly damaging     | 0.618            |
| ANAPC7  | T190I    | Yes                 | Surface          | Solvent exposed.                                                                                                         | None                                     | low                          | 1.24                     | possibly damaging     | 0.763            |
| ANAPC7  | D466N    | Yes                 | Surface          | Solvent exposed                                                                                                          | None                                     | low                          | 0.895                    | probably damaging     | 0.974            |
| ANAPC10 | V74M     | Yes                 | Buried           | Destabilising; M is bulkier than V                                                                                       | Mild/Strong                              | medium                       | 2.15                     | probably damaging     | 0.959            |
| ANAPC10 | H152D    | Yes                 | Surface          | At bipartite substrate recognition site; Close to D-box binding site, may disrupt substrate binding (Chang et al., 2015) | None                                     | high                         | 3.685                    | probably damaging     | 1                |
| ANAPC11 | P73S     | Yes                 | Buried           | Destabilising; P stacked between aromatic rings. Close to UbcH10-binding site, predict would impair UbcH10 binding       | Strong                                   | neutral                      | 0.345                    | probably damaging     | 0.99             |
| ANAPC11 | A135T    | No                  | N/A              | N/A                                                                                                                      | N/A                                      |                              |                          |                       |                  |
| ANAPC11 | E21Q     | Yes                 | Surface          | On a long surface loop                                                                                                   | None                                     | low                          | 1.655                    | benign                | 0.436            |
| ANAPC13 | M55I     | Yes                 | Surface          | Forms interface with Cdc23.                                                                                              | Mild. Similar side chain property.       | low                          | 1.1                      | benign                | 0.001            |
| CDC16   | D27H     | Yes                 | Buried           | Salt bridge disrupted                                                                                                    | Mild/Strong                              | medium                       | 2.74                     | probably damaging     | 1                |
| CDC16   | D546G    | No                  |                  |                                                                                                                          |                                          | low                          | 0.895                    | possibly damaging     | 0.629            |
| CDC16   | D617H    | No                  |                  |                                                                                                                          |                                          | low                          | 0.975                    | probably damaging     | 0.999            |
| CDC16   | E603K    | No                  |                  |                                                                                                                          |                                          | low                          | 0.895                    | possibly damaging     | 0.455            |
| CDC16   | M610L    | No                  |                  |                                                                                                                          |                                          | low                          | 0.975                    | benign                | 0.167            |
| CDC16   | R55G     | Yes                 | Buried           | Salt bridge disrupted                                                                                                    | Strong                                   | medium                       | 2.795                    | probably damaging     | 0.999            |
| CDC16   | N100K    | No                  | Surface?         | On a disordered loop in both subunits                                                                                    | N/A                                      | neutral                      | 0.55                     | benign                | 0.156            |
| CDC16   | L580R    | No                  | N/A              | N/A                                                                                                                      | N/A                                      | neutral                      | 0.345                    | benign                | 0.145            |
| CDC16   | L148M    | Yes                 | Surface          | Solvent exposed                                                                                                          | None                                     | low                          | 1.055                    | possibly damaging     | 0.883            |
| CDC16   | H241N    | Yes                 | Surface          | Solvent exposed                                                                                                          | None                                     | low                          | 1.04                     | benign                | 0.19             |
| CDC20   | P477A    | No                  | Surface          | On a loop connecting WD40 domain to IR motif; may disrupt coactivator binding.                                           | Strong                                   | neutral                      | 0.69                     | probably damaging     | 1                |
| CDC20   | E111K    | No                  |                  | Glu111 forms a salt bridge with Lys114. Mutation would be predicted to be de-stabilizing. (Zhang et al., 2016)           |                                          | medium                       | 3.04                     | benign                | 0.376            |
| CDC20   | L151F    | No                  |                  | N-terminal; could disrupt APC interaction                                                                                |                                          | medium                       | 2.86                     | probably damaging     | 0.972            |
| CDC20   | P21S     | No                  |                  | N-terminal; could disrupt APC interaction                                                                                |                                          | neutral                      | 0.755                    | benign                | 0.001            |
| CDC20   | Q68R     | No                  |                  | N-terminal; could disrupt APC interaction                                                                                |                                          | low                          | 1.78                     | benign                | 0.005            |
| CDC20   | R132P    | Yes (MCC structure) |                  | Disrupt KILR motif; could disrupt APC/C and Mad2 binding                                                                 | Disrupts MCC function                    | medium                       | 2.005                    | possibly damaging     | 0.86             |
| CDC20   | R44L     | No                  |                  | N-terminal; could disrupt APC interaction                                                                                |                                          | neutral                      | 0.69                     | benign                | 0.149            |
| CDC20   | S268F    | Yes (MCC structure) |                  | Surface mutation on WD40 domain.                                                                                         | Mild                                     | medium                       | 2.69                     | benign                | 0.375            |
| CDC23   | I76F     | Yes                 | Buried           | Hydrophobicity and size preserved                                                                                        | Mild                                     | neutral                      | -0.695                   | benign                | 0                |
| CDC23   | M84T     | Yes                 | Buried           | Destabilising                                                                                                            | Mild/Strong                              | neutral                      | -0.695                   | benign                | 0.001            |
| CDC23   | P568R    | No                  |                  |                                                                                                                          |                                          | low                          | 1.24                     | benign                | 0                |
| CDC23   | R101L    | Yes                 | Buried           | Salt bridge disrupted                                                                                                    | Strong                                   | medium                       | 3.36                     | possibly damaging     | 0.872            |
| CDC23   | S121F    | Yes                 | Buried           | Destabilising                                                                                                            | Strong                                   | medium                       | 2.96                     | probably damaging     | 1                |
| CDC23   | T582P    | No                  | N/A              | N/A                                                                                                                      | N/A                                      | low                          | 1.5                      | benign                | 0.015            |
| CDC23   | V595A    | No                  |                  |                                                                                                                          |                                          | neutral                      | 0.69                     | benign                | 0.017            |

**Supplementary Table S5 (continued)**

| Gene                  | Mutation     |
|-----------------------|--------------|
| Truncating mutations: |              |
| ANAPC1                | W641*        |
| ANAPC1                | E1513*       |
| ANAPC1                | G1640_splice |
| ANAPC4                | L79_splice   |
| ANAPC4                | S562_splice  |
| ANAPC4                | E186*        |
| ANAPC4                | R728*        |
| ANAPC4                | Q477_splice  |
| ANAPC4                | E293*        |
| ANAPC4                | A459_splice  |
| ANAPC5                | E49*         |
| ANAPC5                | E729*        |
| ANAPC5                | Q505_splice  |
| ANAPC7                | L464*        |
| CDC16                 | E35_splice   |
| CDC16                 | Q18*         |
| CDC26                 | R23*         |
| CDC27                 | E736*        |
| CDC27                 | T320_splice  |
| CDC27                 | Q793*        |
| CDC20                 | E98*         |
| CDC20                 | W470*        |
